# Supplementary material
Source: Springer Nature journal article supplement (https://www.springermedizin.de/resource/supplementary/12888_2010_650_MOESM4_ESM.pdf/9478048)
Supplement: MOESM4 [file 9478048]

Recruitment

Allocated to intervention

Received intervention

70,000 adults

Respondents to screening survey

Exclude ineligible respondents (screening survey, telephone; see Table 2)

Eligible + verbal consent

Exclude those without written consent.\*

Randomization by statistician

HealthWatch    E-couch    Board    E-couch + Board

Participant informed of condition

Baseline measurement

HealthWatch    E-couch    Board    E-couch + Board

Intervention

Post intervention Survey

Follow up 6 months

Follow up 12 months

\*(Participant/staff not informed of condition)
